# Supplementary material for: Targeted inactivation and identification of targets of the Gli2a transcription factor in the zebrafish
Source: PubMed Central journal article supplement (PMC3828767; doi:10.1242/bio.20136262), 2013-09-09
Supplement: supp_bio.20136262_bio.20136262-s1.pdf [file supp_bio.20136262_bio.20136262-s1.pdf]

Supplementary Material  
Xingang Wang et al. doi: 10.1242/bio.20136262

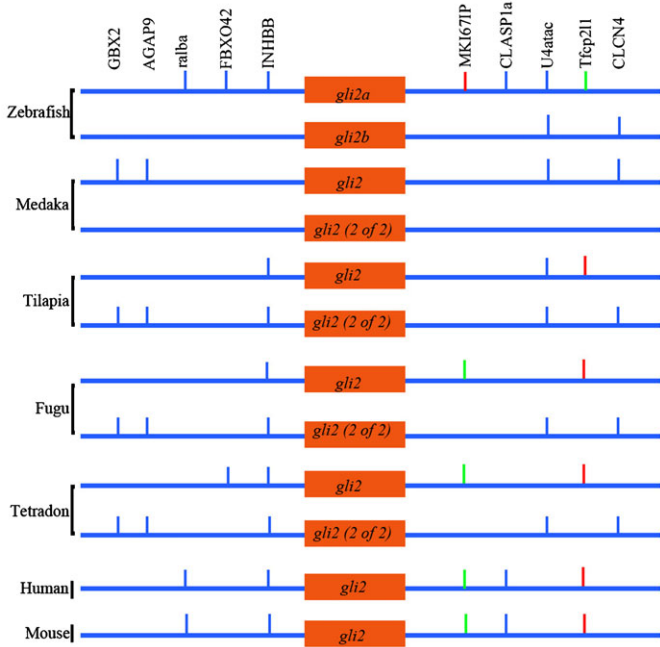

Fig. S1. Synteny relationships of teleost and mammalian *Gli2* genes.

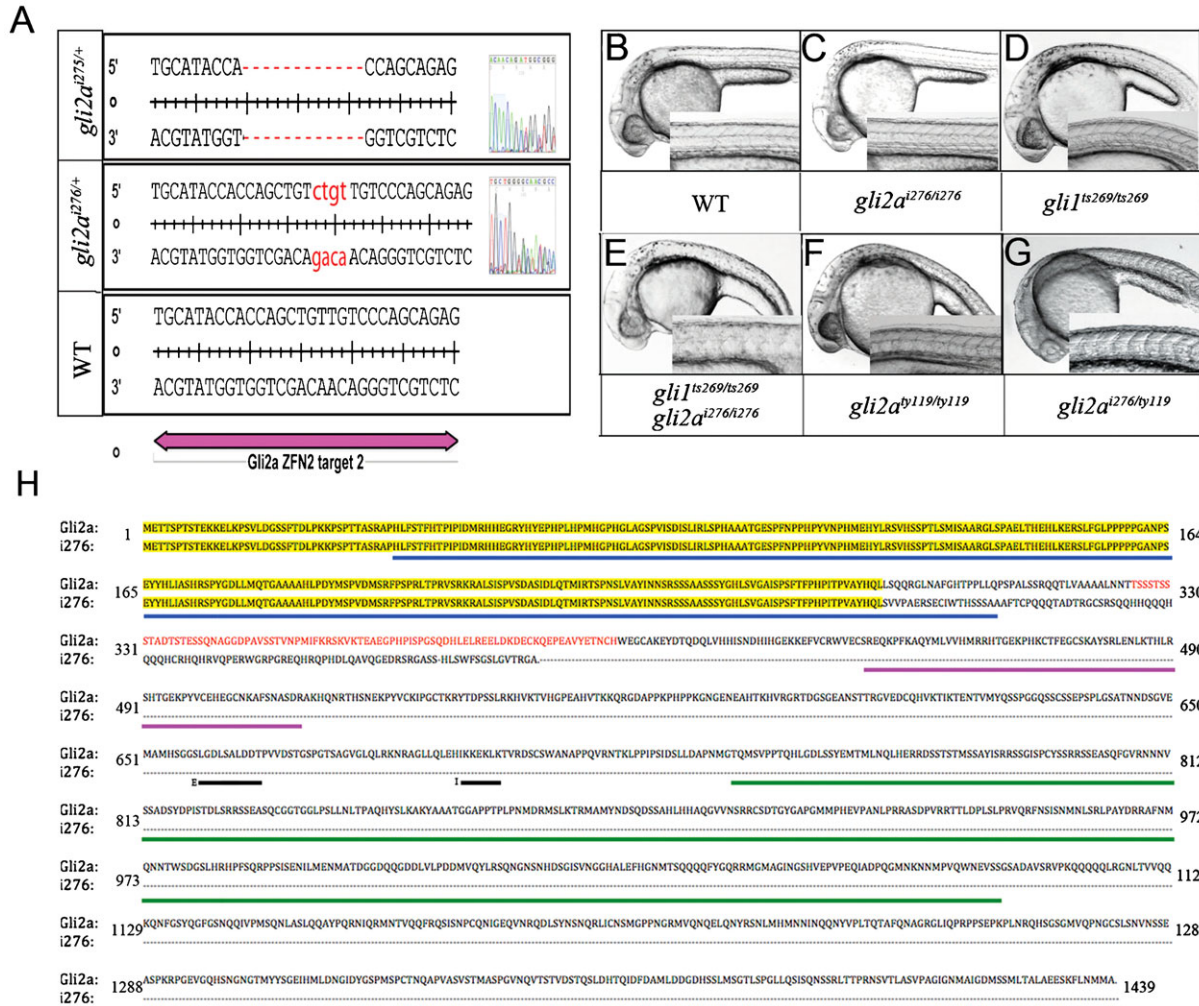

**Fig. S2. Sequence information and morphological phenotype of new *gli2a* mutant alleles.** (A) Sequence information of *gli2a<sup>i275/+</sup>* and *gli2a<sup>i276/+</sup>* at ZFN target site. (B–G) Morphological phenotype of wild type, *gli2a<sup>i276/i276</sup>*, *gli1<sup>ts269/ts269</sup>*, *gli1<sup>ts269/ts269</sup> gli2a<sup>i276/i276</sup>*, *gli2a<sup>ty119/ty119</sup>*, and *gli2a<sup>i276/ty119</sup>* at 30 hpf. (H) Alignment of Gli2a and Gli2a<sup>i276</sup> amino acid sequence. Sequences highlighted in yellow show the common amino acids between them, sequence in red indicates the antigen region for generating the Gli2a antibody used in this study. Sequences underlined indicate the Gli2a repressor domain (blue), zinc finger DNA binding domain (pink), nuclear localization sequences (black) and activator domain (green). All domains were annotated by alignment with the human GLI2 protein (Fernández-Zapico, 2008).

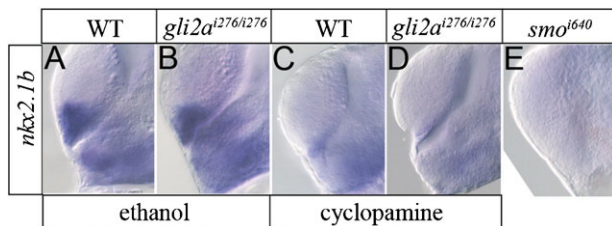

**Fig. S3. *nkx2.1b* expression is not changed in *gli2a<sup>i276/i276</sup>*.** *nkx2.1b* expression at diencephalon and telencephalon was examined by WISH on wild type (A), *gli2a<sup>i276/i276</sup>* (B), wild type treated with cyclophamine (C), *gli2a<sup>i276/i276</sup>* treated with cyclophamine (D), and *smo<sup>i640</sup>* (E).

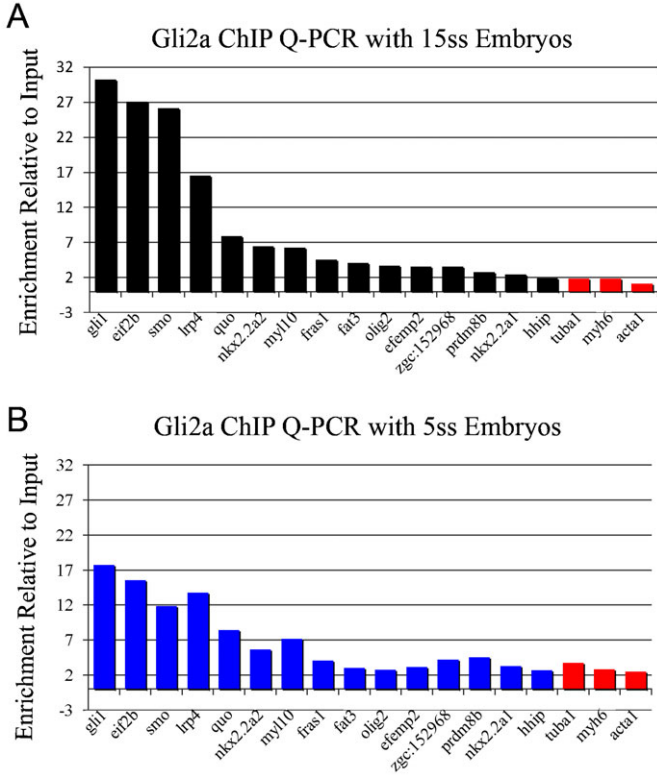

Fig. S4. Validation of ChIP-seq peaks by Q-PCR.

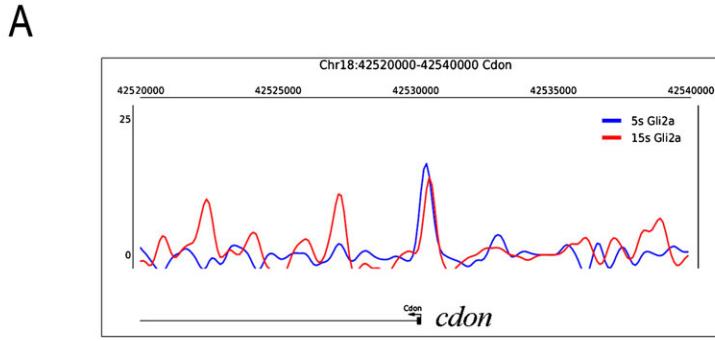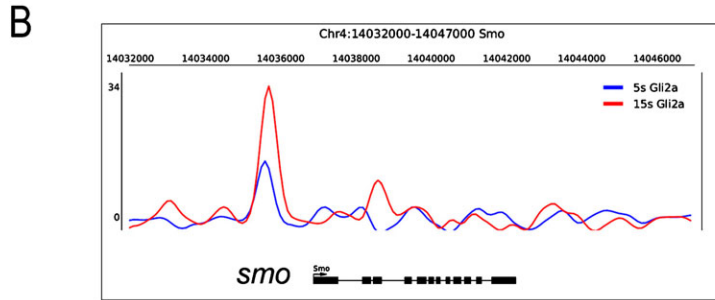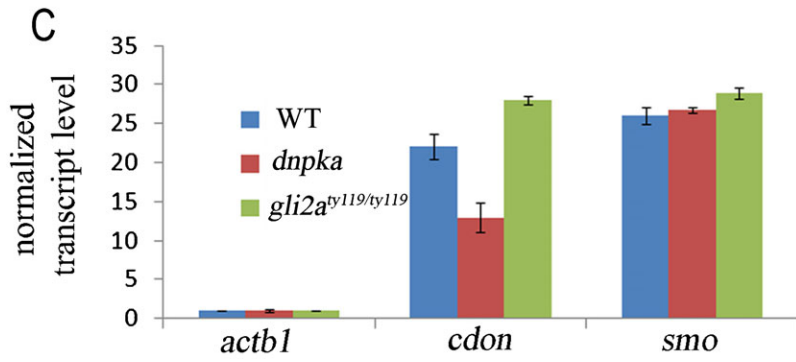

**Fig. S5.** Analysis of *smo* and *cdon* as putative Gli2a targets. Gli bound region on *cdon* (A) and *smo* (B), and effect of dnPKA and *gli2a<sup>ty119/ty119</sup>* on their transcription level (C).

**Table S1. Sequences of primer pairs used for Q-PCR validation of ChIP-seq peaks.**

|             |                                 |
|-------------|---------------------------------|
| gli1F       | 5' TGGGCTGCTGCTGCTTCTT 3'       |
| gli1R       | 5' TCTGGCTTGTGATTGGCTGATA 3'    |
| eif2bF      | 5' CCACCCACAGACTCCAG 3'         |
| eif2bR      | 5' CACCCTCTCTCCGCTCTC 3'        |
| smoF        | 5' CATGGCGGCTGTAGAATGAGA 3'     |
| smoR        | 5' CTCTCCTCATTGGTGTGTGTG 3'     |
| lrp4F       | 5' ACAGAGCAGAGGAAAATAAGACC 3'   |
| lrp4R       | 5' TGACGCATGGCTGCTGTCA 3'       |
| quoF        | 5' CGGTGCTGATCGAGTCTCTC 3'      |
| quoR        | 5' GCGCCTCAAACACTGAGAGAG 3'     |
| nkx2.2a2F   | 5' CCAGAGGGAGCCTTTCATTGc 3'     |
| nkx2.2a2R   | 5' TGATGTGAATGTTTCAGTGGGCT 3'   |
| myl10F      | 5' GACGGAATGAAAGGCTGATAGAG 3'   |
| myl10R      | 5' TGCTCCGCTCCGTGTTTTG 3'       |
| fras1F      | 5' GGTCTGTTTCAGGCCACAC 3'       |
| fras1R      | 5' CAAAGCAGCAGAAGTAAACAGCA 3'   |
| fat3F       | 5' GCGTCCTGTCCAGCGTCAT 3'       |
| fat3R       | 5' GCACTTCCACAGCCACCAG 3'       |
| olig2F      | 5' TGTGATAGTCGGTCTGTCTG 3'      |
| olig2R      | 5' GATGTGAACCCCTGAGCC 3'        |
| efemp2F     | 5' GACAGCTGGACTGTGAATGTATGC 3'  |
| efemp2R     | 5' GCAGACCAGGAATTTTCATCCT 3'    |
| zgc:152968F | 5' TGCTGCACAGGAGCAAGAGG 3'      |
| zgc:152969R | 5' ACATTCTGGCTCAAGCACACTC 3'    |
| prdm8bF     | 5' TTAATGCAATATGTATCCACGAGGT 3' |
| prdm8bR     | 5' CAACTGCTGAGGCGGTCAA 3'       |
| nkx2.2a1F   | 5' AAAGCACATCAGGCTTATCGGT 3'    |
| nkx2.2a1R   | 5' CGTTGAGACACCGCACAGTTA 3'     |
| hhipF       | 5' TGTAACAACCTCCGTAATCGAC 3'    |
| hhipR       | 5' ATGCAATATGGCTTTTTGTCACA 3'   |
| tuba1F      | 5' GATGCCATGAGAATTTAGTGCT 3'    |
| tuba1R      | 5' TCATCTCAATGCCTCCTTCATC 3'    |
| myh6F       | 5' CAATCCTGTCGCCATTCTTAA 3'     |
| myh6R       | 5' CTGTTCAATTTATCCGCCCTCA 3'    |
| actb1F      | 5' ACCGTGCCCTTGTTTTGTATC 3'     |
| actb1R      | 5' TGTTAGATGCAACCGTATTAAGCA 3'  |

**Table S2. Sequences of primer pairs used for Q-PCR analysis of *smo* and *cdon* expression.**

|        |                              |
|--------|------------------------------|
| smoF   | 5' ACCCACTGGAACCCATTTC 3'    |
| smoR   | 5' CTGGCCGTACTTCTTCCTTC 3'   |
| cdonF  | 5' CTGGAGCAGCAGAGAGGAGTTC 3' |
| cdonR  | 5' TCAGGCTCCAGTAGAGATCCA 3'  |
| actb1F | 5' GCTTCCCGAGAGGACAAC 3'     |
| actb1R | 5' GTCATGGACGCCATTGTGA 3'    |

**Table S3. *gli2a* mutant viability.**

| Parental genotypes                                              | Number of embryos at 50% epiboly stage | Number of larvae surviving at 7 dpf | Number of fish surviving at one month | Number of homozygotes amongst 24 fish |
|-----------------------------------------------------------------|----------------------------------------|-------------------------------------|---------------------------------------|---------------------------------------|
| <i>gli2a</i> <sup>i276/+</sup> × <i>gli2a</i> <sup>i276/+</sup> | 80                                     | 77 ± 3                              | 73 ± 2                                | 5 ± 1                                 |
| <i>gli2a</i> <sup>i276/+</sup> × <i>gli2a</i> <sup>not/+</sup>  | 80                                     | 24 ± 3                              | N.T.                                  | N.T.                                  |

N.T. = not tested.

Table S5. Putative Gli2a target genes with spatially restricted expression patterns.

| Gene name      | Expression patterns                                    |
|----------------|--------------------------------------------------------|
| <i>arid1a</i>  | last three somites                                     |
| <i>atp6ap2</i> | ear                                                    |
| <i>bcl6b</i>   | head region, like <i>krox20</i>                        |
| <i>bcor</i>    | head and the region between yolk extension and tailbud |
| <i>caena1c</i> | somite, area below ear                                 |
| <i>camk2g</i>  | notochord                                              |
| <i>cdon</i>    | neuron crest                                           |
| <i>daam1b</i>  | slow muscle and notochord                              |
| <i>dlg4</i>    | neural tube                                            |
| <i>dlgap2</i>  | somite ear                                             |
| <i>efemp2</i>  | slow and fast muscle                                   |
| <i>exoc2</i>   | neural tube                                            |
| <i>fat3</i>    | neural tube                                            |
| <i>foxq1</i>   | two arterial ventral lines                             |
| <i>fras1</i>   | slow and fast muscle                                   |
| <i>hnmt</i>    | adaxial cells                                          |
| <i>lame1</i>   | fin fold, notochord                                    |
| <i>lhx2b</i>   | pronephros, ear and tailbud                            |
| <i>lrp4</i>    | somite tail bud                                        |
| <i>mpp5a</i>   | neural tube                                            |
| <i>myl10</i>   | slow muscle                                            |
| <i>olig2</i>   | neural tube                                            |
| <i>prdm8b</i>  | adaxial cells                                          |
| <i>quo</i>     | slow and fast muscle                                   |
| <i>rfx4</i>    | neural tube                                            |
| <i>sox6</i>    | fast muscle                                            |

Table S6. Comparison of GBRs associated with *ptch* genes in mouse and zebrafish.

| Gene name                                | Peak location <sup>1</sup>                | Conservation          | Overlapping with fish Chip-seq <sup>2</sup> |
|------------------------------------------|-------------------------------------------|-----------------------|---------------------------------------------|
| <i>ptch1</i><br>Chr13: 63520754–63574741 | 63910111–63911676                         | Mammal                |                                             |
|                                          | 63575251–63577130                         | Mammal, fish          | Peak I                                      |
|                                          | 63960043–63961972                         | Mammal                |                                             |
|                                          | 63571416–63574567                         | Mammal, fish          | Peak II                                     |
|                                          | 63537116–63520754                         | Mammal                |                                             |
|                                          | 63577383–63579734                         | Mammal, chicken       |                                             |
|                                          | 63580817–63584094                         | Mammal, fish          |                                             |
|                                          | 63989338–63990236                         | Mammal                |                                             |
|                                          | 63728561–63729448                         | Mammal, chicken       |                                             |
|                                          | 63734451–63735522                         | Not conserved         |                                             |
|                                          | 63978718–63979650                         | Mammal                |                                             |
|                                          | 63533758–63535600                         | Mammal, chicken, fish |                                             |
|                                          | 64029689–64030526                         | Mammal                |                                             |
|                                          | 63567246–63568264                         | Mammal                |                                             |
|                                          | <i>ptch2</i><br>Chr4: 116594287–116612762 | 116595951–116597000   | Mammal, fish                                |
| 116588169–116588714                      |                                           | Mammal                |                                             |
| 116593083–116594782                      |                                           | Human, dog, mice      |                                             |

<sup>1</sup>All locations here are based on Mouse Genome Version February 2006 (NCBI36 mm8).<sup>2</sup>Peak numbers are consistent with Fig. 5.
